# Supplementary material for: Cyclization of ortho-hydroxycinnamates to coumarins under mild conditions: A nucleophilic organocatalysis approach
Source: PubMed Central journal article supplement (PMC3510995; doi:10.3762/bjoc.8.186), 2012-09-26

# Supporting Information

for

## **Cyclization of *ortho*-hydroxycinnamates to coumarins under mild conditions: A nucleophilic organocatalysis approach**

Florian Boeck, Max Blazejak, Markus R. Anneser and Lukas Hintermann\*

Address: Department Chemie, Technische Universität München, Lichtenbergstr. 4,  
85748 Garching, Germany

Email: Lukas Hintermann\* - lukas.hintermann@tum.de

\* Corresponding author

## **Experimental procedures, characterization data and copies of NMR spectra**

### **Contents**

|                                                          |           |
|----------------------------------------------------------|-----------|
| <b>1. General</b>                                        | <b>S2</b> |
| <b>2. Synthesis of methyl 2'-hydroxycinnamates 3</b>     | <b>S2</b> |
| <b>3. Synthesis of coumarins</b>                         | <b>S4</b> |
| <b>4. <sup>31</sup>P NMR spectra of reaction mixture</b> | <b>S7</b> |
| <b>5. NMR spectra</b>                                    | <b>S8</b> |

## 1. General

Reactions were carried out under an argon atmosphere. F-TEDA and NCS were obtained from Aldrich. Column chromatography was performed by using silica gel 60 (particle size 40–63  $\mu\text{m}$ ). NMR spectra were recorded in  $\text{CDCl}_3$  at ambient temperature (20–25  $^\circ\text{C}$ ) relative to TMS, unless otherwise noted.  $^{13}\text{C}$  NMR shifts are relative to TMS, but referenced through the solvent peaks. Abbreviations: aq = dissolved in water. CC is column chromatography (on  $\text{SiO}_2$ ). sat = “saturated solution of”. THF is tetrahydrofuran.

## 2. Synthesis of methyl 2'-hydroxycinnamates 3

### General procedure for the synthesis of methyl 2'-hydroxycinnamates 3 (GP1)

Methyl(triphenylphosphoranylidene)acetate ( $\text{Ph}_3\text{P}=\text{CHCO}_2\text{Me}$ ; 1.5 equiv) was added under stirring to a solution of 2-hydroxyarylaldehyde (1.0 equiv) in dichloromethane (5 mL/mmol) at 0  $^\circ\text{C}$ , and the resulting yellow solution was stirred overnight (15 h) with warming to rt. After the addition of  $\text{SiO}_2$ , the solvent was removed under reduced pressure to give a fine powdery residue. This material was placed on top of a short silica gel column and eluted with EtOAc/hexanes 1:1. The combined product fractions were evaporated to a small volume and the product was crystallized by covering the concentrated solution with hexanes and allowing it to stand in a fridge (4  $^\circ\text{C}$ ).

| Product                                                                            | Scale     | Yield |
|------------------------------------------------------------------------------------|-----------|-------|
| ( <i>E</i> )-Methyl 2'-hydroxycinnamate ( <b>3a</b> )                              | 14 mmol   | 91%   |
| ( <i>E</i> )-Methyl 2'-hydroxy-5'-nitrocinnamate ( <b>3b</b> )                     | 11 mmol   | 15%   |
| ( <i>E</i> )-Methyl 3-(2-hydroxynaphthalen-1-yl)acrylate ( <b>3c</b> )             | 12.4 mmol | 88%   |
| ( <i>E</i> )-Methyl 2'-hydroxy-3'-methoxycinnamate ( <b>3d</b> )                   | 5 mmol    | 85%   |
| ( <i>E</i> )-Methyl 2'-hydroxy-4'-methoxycinnamate ( <b>3e</b> )                   | 6.6 mmol  | 93%   |
| ( <i>E</i> )-Methyl 4'- <i>N,N</i> -diethylamino-2'-hydroxycinnamate ( <b>3f</b> ) | 15 mmol   | 70%   |
| ( <i>E</i> )-Methyl 3'-allyl-2'-hydroxycinnamate ( <b>3g</b> )                     | 2 mmol    | 96%   |
| ( <i>E</i> )-Methyl 5'-bromo-2'-hydroxycinnamate ( <b>3h</b> )                     | 15 mmol   | 82%   |
| ( <i>E</i> )-Methyl 3',5'-di- <i>tert</i> -butyl-2'-hydroxycinnamate ( <b>3i</b> ) | 8.5 mmol  | 91%   |
| ( <i>E</i> )-Methyl 3',5'-dichloro-2'-hydroxycinnamate                             | 10.5 mmol | 99%   |

## Specific substances

Most of the 2'-hydroxycinnamates were known compounds and their data corresponded to those described in the literature. The following compounds or data have not been described in the literature:

### (*E*)-Methyl 2'-hydroxy-5'-nitrocinnamate (3b)

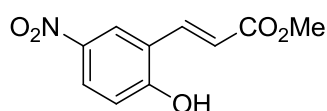

Synthesized according to the general procedure GP1, yield 15%, not optimized; the product was difficult to separate from side-products.

$^1\text{H}$  NMR (360 MHz,  $\text{CDCl}_3$ ):  $\delta$  = 7.69 (d,  $J$  = 9.6 Hz, 1H), 7.21 (t,  $J$  = 8.0 Hz, 1H), 7.10–7.05 (2H), 6.43 (d,  $J$  = 9.5 Hz, 1H), 3.97 (s, 3H) ppm.  $^{13}\text{C}$  NMR (90 MHz,  $\text{CDCl}_3$ ):  $\delta$  = 160.2 (C=O), 147.3 (C), 143.8 (C), 143.5 (CH), 124.3 (CH), 119.5 (C), 119.3 (CH), 117.0 (CH), 113.8 (CH), 56.3 ( $\text{CH}_3$ ) ppm.

### (*E*)-Methyl 2'-hydroxy-3'-methoxycinnamate (3d)

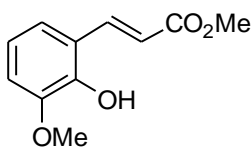

Synthesized according to the general procedure GP1, 85% yield.

CAS-Nr. 1135-24-6. Mp 114 °C.  $^1\text{H}$  NMR (360 MHz,  $\text{CDCl}_3$ ):  $\delta$  = 7.95 (d,  $J$  = 16.1 Hz, 1H), 7.08 (dd,  $J$  = 6.8, 1.6 Hz, 1H), 6.88–6.84 (m, 2H), 6.61 (d,  $J$  = 16.1 Hz, 1H), 6.17 (s, 1H), 3.91 (s, 3H), 3.80 (s, 3H) ppm.

$^{13}\text{C}$  NMR (90 MHz,  $\text{CDCl}_3$ ):  $\delta$  = 167.9 (C=O), 146.8 (C), 145.3 (C), 139.8 (CH), 120.9 (CH), 120.8 (C), 119.7 (CH), 118.8 (CH), 111.7 (CH), 56.2 ( $\text{CH}_3$ ), 51.6 ( $\text{CH}_3$ ) ppm.

### (*E*)-Methyl 3'-allyl-2'-hydroxycinnamate (3g)

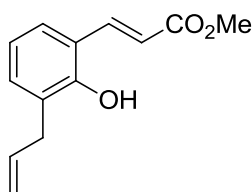

Synthesized according to the general procedure GP1, 96% yield.

Mp 77 °C.  $^1\text{H}$  NMR (360 MHz,  $\text{CDCl}_3$ ):  $\delta$  = 8.02 (d,  $J$  = 16.1 Hz, 1H), 7.40 (dd,  $J$  = 7.8, 1.5 Hz, 1H), 7.14 (dd,  $J$  = 7.5, 1.5, 1H), 6.90 (t,  $J$  = 7.6 Hz, 1H), 6.53 (d,  $J$  = 16.1 Hz, 1H), 6.07–5.96 (m, 1H), 5.28–5.20

(m, 2H), 3.80 (s, 3H), 3.45 (t,  $J$  = 6.2 Hz, 2H) ppm.  $^{13}\text{C}$  NMR (90 MHz,  $\text{CDCl}_3$ ):  $\delta$  = 167.9 (C=O), 153.8 (C), 140.0 (CH), 137.7 (CH), 132.4 (CH), 127.4 (CH), 125.4 (C), 122.4 (C), 120.9 (CH), 118.5 (CH), 117.7 (CH), 51.6 ( $\text{CH}_3$ ), 25.7 ( $\text{CH}_2$ ) ppm.

### 3. Synthesis of coumarins

#### General procedure for synthesis of coumarins (GP2):

The starting alkyl hydroxycinnamate (1 mmol) was inserted in a headspace vial with a magnetic stirring bar. The vial was flushed with argon and capped. Methanol (1 mL, degassed with argon) was added by syringe through the cap. After addition of tri-*n*-butylphosphane (50  $\mu$ L, 0.2 mmol; 20 mol %) with a microliter syringe, the solution turned bright yellow. The reaction mixture was heated to 70 °C and stirred for 20 h. The reaction was quenched by the addition of 1,2-dibromoethane (20  $\mu$ L, 0.23 mmol, 0.23 equiv) and cooled to room temperature. After evaporation, the crude mixture was purified by column chromatography.

#### Substances

##### 2*H*-Chromen-2-one (coumarin; **2 = 4a**)

Synthesized according to the general procedure from (*E*)-ethyl 2'-hydroxycinnamate (192 mg, 1 mmol). After work-up and CC (SiO<sub>2</sub>, EtOAc/hexanes 1:5 + 5% NEt<sub>3</sub>), a colorless crystalline solid (120 mg, 82 % yield) was isolated.

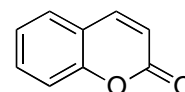

CAS-Nr. 91-64-5. Mp 70–70.5 °C.  $R_f$  = 0.28 (EtOAc/hexanes 1:5 + 5% NEt<sub>3</sub>). <sup>1</sup>H NMR (360 MHz, CDCl<sub>3</sub>):  $\delta$  = 7.71 (dd,  $J$  = 9.5, 0.5 Hz, 1H), 7.56–7.51 (m, 1H), 7.49 (dd,  $J$  = 7.7, 1.6 Hz, 1H), 7.34 (d,  $J$  = 8.1 Hz, 1H), 7.27 (dt,  $J$  = 7.6, 1.1 Hz, 1H), 6.43 (d,  $J$  = 8.5 Hz, 1H) ppm. <sup>13</sup>C NMR (90 MHz, CDCl<sub>3</sub>):  $\delta$  = 160.1 (C=O), 154.0 (C), 143.3 (CH), 131.8 (CH), 127.8 (CH), 124.3 (CH), 118.8 (C), 116.8 (CH), 116.6 (CH) ppm.

##### 3*H*-Benzo[*f*]chromen-3-one (**4c**)

Synthesized according to the general procedure from (*E*)-methyl 3-(2-hydroxynaphthalen-1-yl)acrylate (228 mg, 1 mmol). After work-up and CC (EtOAc/hexanes 1:10 + 5% NEt<sub>3</sub>) a yellowish crystalline solid (189 mg, 96%) was obtained.

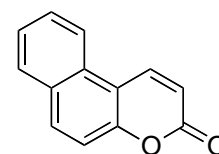

CAS-Nr.: 4352-89-0. Mp 118 °C.  $R_f$  = 0.32 (EtOAc/hexanes 1:10 + 5% NEt<sub>3</sub>). <sup>1</sup>H NMR (360 MHz, CDCl<sub>3</sub>):  $\delta$  = 8.47 (d,  $J$  = 9.7 Hz, 1H), 8.21 (d,  $J$  = 8.4 Hz, 1H), 7.97 (d,  $J$  = 9.0 Hz, 1H), 7.90 (d,  $J$  = 8.1 Hz, 1H), 7.71–7.66 (m, 1H), 7.59–7.54 (m, 1H), 7.44 (d,  $J$  = 9.2 Hz, 1H), 6.56 (d,  $J$  = 9.8 Hz, 1H) ppm. <sup>13</sup>C NMR (90 MHz, CDCl<sub>3</sub>):  $\delta$  = 160.9 (C=O), 153.9 (C), 139.1

(CH), 133.1 (CH), 130.3 (CH), 129.0 (C), 128.3 (CH), 126.1 (CH), 121.3 (CH), 117.1 (CH), 115.6 (CH), 113.0 (C) ppm.

### 8-Methoxy-2*H*-chromen-2-one (8-methoxycoumarin, 4d)

Synthesized according to the general procedure from (*E*)-methyl 2-hydroxy-3-methoxycinnamate (208 mg, 1 mmol). After work-up and CC (EtOAc/hexanes 1:5 + 5% NEt<sub>3</sub>) a colorless crystalline solid (155 mg, 88%) was isolated.

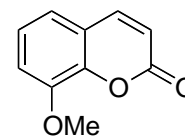

CAS-Nr. 2445-81-0. Mp 91 °C; *R*<sub>f</sub> = 0.18 (EtOAc/hexanes 1:5 + 5% NEt<sub>3</sub>). <sup>1</sup>H NMR (360 MHz, CDCl<sub>3</sub>): δ = 7.69 (d, *J* = 9.6 Hz, 1H), 7.21 (t, *J* = 7.8 Hz, 1H), 7.11–7.05 (m, 1H), 6.44 (d, *J* = 9.5 Hz, 1H), 3.97 (s, 3H) ppm. <sup>13</sup>C NMR (90 MHz, CDCl<sub>3</sub>): δ = 180.2 (C=O), 147.3 (C), 143.8 (C), 143.6 (CH), 124.3 (CH), 119.5 (C), 119.3 (CH), 117.0 (CH), 113.8 (CH), 56.8 (CH<sub>3</sub>) ppm.

### 7-Methoxy-2*H*-chromen-2-one (7-methoxycoumarin, 4e)

Synthesized according to the general procedure from (*E*)-methyl 2-hydroxy-4-methoxy-cinnamate (228 mg, 1 mmol). After work-up and CC (EtOAc/hexanes 1:5 + 5% NEt<sub>3</sub>) a colorless crystalline solid (147 mg, 83%) was obtained.

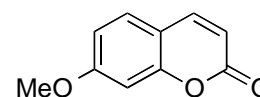

CAS-Nr. 531-59-9. Mp 119 °C. *R*<sub>f</sub> = 0.27 (EtOAc/hexanes 1:5 + 5% NEt<sub>3</sub>). <sup>1</sup>H NMR (360 MHz, CDCl<sub>3</sub>): δ = 7.65 (d, *J* = 9.4 Hz, 1H), 7.38 (d, *J* = 8.5 Hz, 1H), 6.85 (dd, *J* = 8.5, 2.4 Hz, 1H), 6.81 (d, *J* = 2.4 Hz, 1H), 6.25 (d, *J* = 9.5 Hz, 1H), 3.87 (s, 3H) ppm. <sup>13</sup>C NMR (90 MHz, CDCl<sub>3</sub>): δ = 162.8 (C=O), 161.2 (C), 155.9 (C), 143.4 (CH), 128.8 (CH), 128.8 (CH), 113.1 (CH), 112.6 (CH), 112.5 (C), 100.9 (CH), 55.8 (CH<sub>3</sub>) ppm.

### 7-(*N,N*-Diethylamino)-2*H*-chromen-2-one (7-diethylaminocoumarin, 4f)

Synthesized according to the general procedure from (*E*)-methyl 2-hydroxy-4'-*N,N*-diethylaminocinnamate (249 mg, 1 mmol). After work-up and CC (EtOAc/hexanes 1:5 + 5% NEt<sub>3</sub>) a yellow crystalline solid (209 mg, 96%) was isolated.

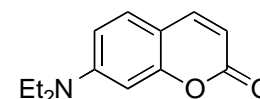

CAS-Nr. 20571-42-0. Mp 90 °C. *R*<sub>f</sub> = 0.32 (EtOAc/hexanes 1:5 + 5% NEt<sub>3</sub>). <sup>1</sup>H NMR (360 MHz, CDCl<sub>3</sub>): δ = 7.54 (d, *J* = 9.4 Hz, 1H), 7.25 (d, *J* = 8.5 Hz, 1H), 6.60 (dd, *J* = 8.6, 2.6 Hz, 1H), 6.51 (d, *J* = 2.6 Hz, 1H), 6.04 (d, *J* = 9.3 Hz, 1H), 3.42 (q, *J* = 7.1 Hz, 4H), 1.21 (t, *J* = 7.1 Hz, 1H) ppm. <sup>13</sup>C NMR (90 MHz, CDCl<sub>3</sub>): δ = 162.2 (C=O), 156.7 (C), 150.5 (C),

143.7 (CH), 128.7 (CH), 109.3 (CH), 108.9 (CH), 108.5 (C), 97.7 (CH), 45.0 (2 x CH<sub>2</sub>), 12.4 (2 x CH<sub>3</sub>) ppm.

### 8-Allyl-2H-chromen-2-one (8-(prop-2-en-1-yl)coumarin, 4g)

Synthesis according to the general procedure from (*E*)-methyl 2'-hydroxy-3'-(prop-2-en-1-yl)cinnamate (218 mg, 1 mmol). After work-up and CC (EtOAc/hexanes 1:10 + 5% NEt<sub>3</sub>) a colorless crystalline solid (178 mg, 96%) was isolated.

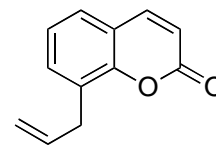

CAS-Nr. 176046-05-2. Mp 44 °C. *R*<sub>f</sub> = 0.35 (EtOAc/hexanes 1:10 + 5% NEt<sub>3</sub>). <sup>1</sup>H NMR (360 MHz, CDCl<sub>3</sub>): δ = 7.71 (d, *J* = 9.5 Hz, 1H), 7.41 (d, *J* = 7.5 Hz, 3H), 7.35 (dd, *J* = 7.7, 1.7 Hz, 1H), 6.41 (t, *J* = 7.6 Hz, 1H), 6.07–5.96 (m, 1H), 5.17–5.13 (m, 1H), 5.12–5.10 (m, 1H), 3.62 (d, *J* = 6.6 Hz, 2H) ppm. <sup>13</sup>C NMR (90 MHz, CDCl<sub>3</sub>): δ = 160.7 (C=O), 151.8 (C), 148.7 (CH), 135.2 (CH), 132.3 (CH), 128.3 (C), 126.0 (CH), 124.1 (CH), 118.7 (C), 116.8 (CH), 116.4 (CH<sub>2</sub>), 33.1 (CH) ppm.

### 6-Bromo-2H-chromen-2-one (6-bromocoumarin, 4h)

Synthesis according to the general procedure from (*E*)-methyl 2'-hydroxy-5'-bromo-cinnamate (257 mg, 1 mmol). After work-up and CC (EtOAc/hexanes 1:5 + 5% NEt<sub>3</sub>) a colorless crystalline solid (169 mg, 75%) was isolated.

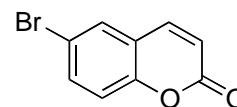

CAS-Nr. 19063-55-9. Mp 165 °C. *R*<sub>f</sub> = 0.13 (EtOAc/hexanes 1:5 + 5% NEt<sub>3</sub>). <sup>1</sup>H NMR (360 MHz, CDCl<sub>3</sub>): δ = 7.65–7.61 (3H), 7.22 (d, *J* = 9.5 Hz, 3H), 6.47 (d, *J* = 9.6 Hz, 1H) ppm. <sup>13</sup>C NMR (90 MHz, CDCl<sub>3</sub>): δ = 159.9 (C=O), 152.9 (C), 142.1 (CH), 134.6 (CH), 130.2 (CH), 120.3 (C), 118.6 (CH), 117.9 (CH), 117.0 (C) ppm.

### 6,8-Di-*tert*-butyl-2H-chromen-2-one (6,8-di-*tert*-butylcoumarin, 4i)

Synthesized according to the general procedure from (*E*)-methyl 2'-hydroxy-3',5'-di-*tert*-butylcinnamate (290 mg, 1 mmol). After work-up and CC (hexanes + 5% NEt<sub>3</sub>) a colorless oil (256 mg, 99%) was isolated.

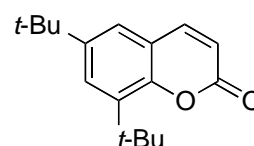

*R*<sub>f</sub> = 0.76 (hexanes + 5% NEt<sub>3</sub>). <sup>1</sup>H NMR (360 MHz, CDCl<sub>3</sub>): δ = 7.69 (d, *J* = 9.5 Hz, 1H), 7.58 (d, *J* = 2.3 Hz, 1H), 7.30 (d, *J* = 2.3 Hz, 1H), 6.38 (d, *J* = 9.5 Hz, 1H), 1.52 (s, 9H), 1.36 (s, 9H) ppm. <sup>13</sup>C NMR (90 MHz, CDCl<sub>3</sub>): δ = 160.9 (C=O), 150.8 (C), 146.7 (C), 144.8 (CH), 137.4 (C), 127.1 (CH), 122.5 (CH), 118.7 (C), 115.5 (CH), 35.1 (CH), 34.7 (C), 31.4 (CH<sub>3</sub>), 29.9 (CH<sub>3</sub>) ppm.

## 4. $^{31}\text{P}$ NMR spectra of the reaction mixture

A catalytic reaction was followed by  $^{31}\text{P}$  NMR spectroscopy in  $[\text{D}_4]\text{-MeOH}$  solution. The reference sample of  $n\text{-Bu}_3\text{P}$  in MeOH shows a broad signal at  $\delta = -30$  ppm, plus impurities in the 40 to 65 ppm range (other phosphines and oxides) already present in the commercial sample. In the course of the reaction, only a peak at  $\delta = +37$  ppm is visible, which may correspond to a phosphonium salt ( $n\text{-Bu}_3\text{P}^+\text{-R}$ ) resting state.

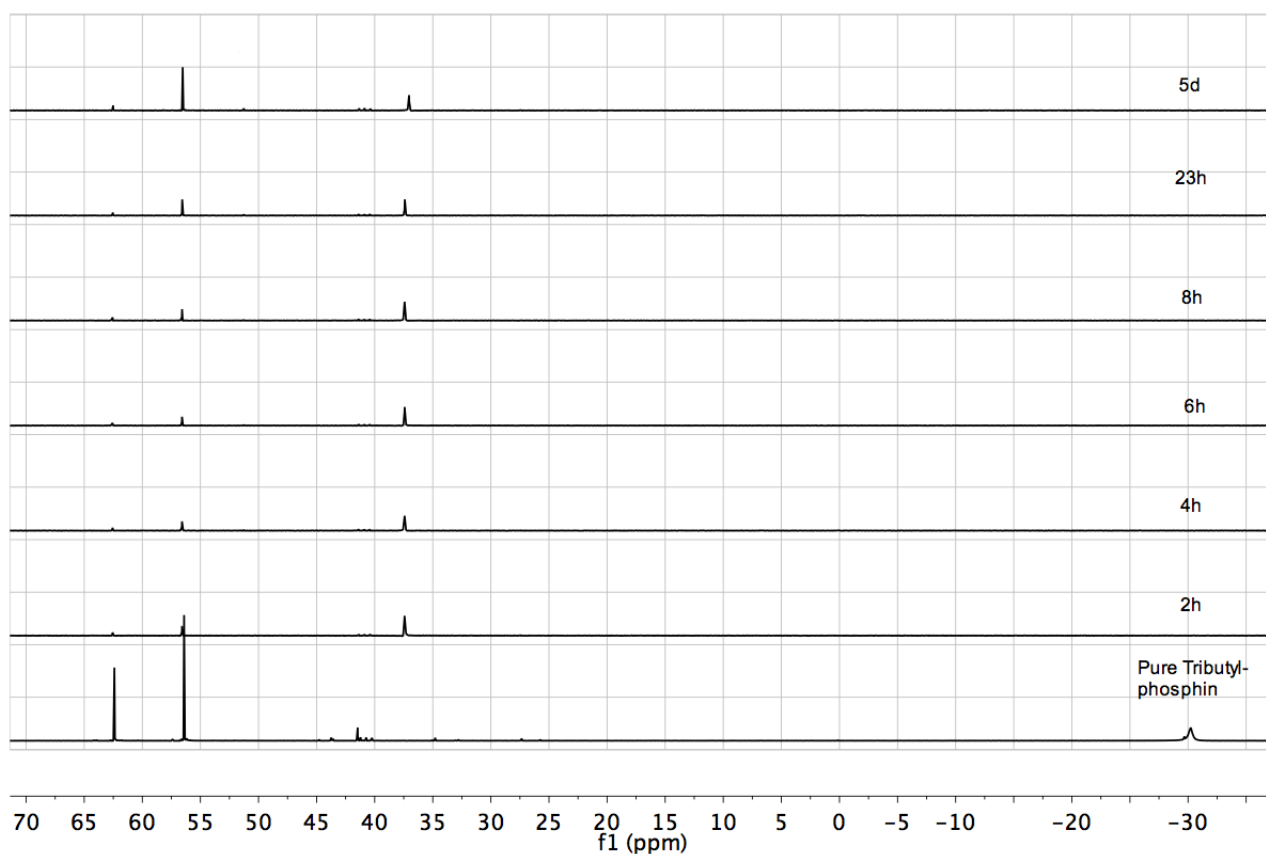

## 5. NMR spectra

### $^1\text{H}$ NMR (360 MHz) of 5-nitro-2-hydroxy-(*E*)-cinnamic acid methyl ester (3b)

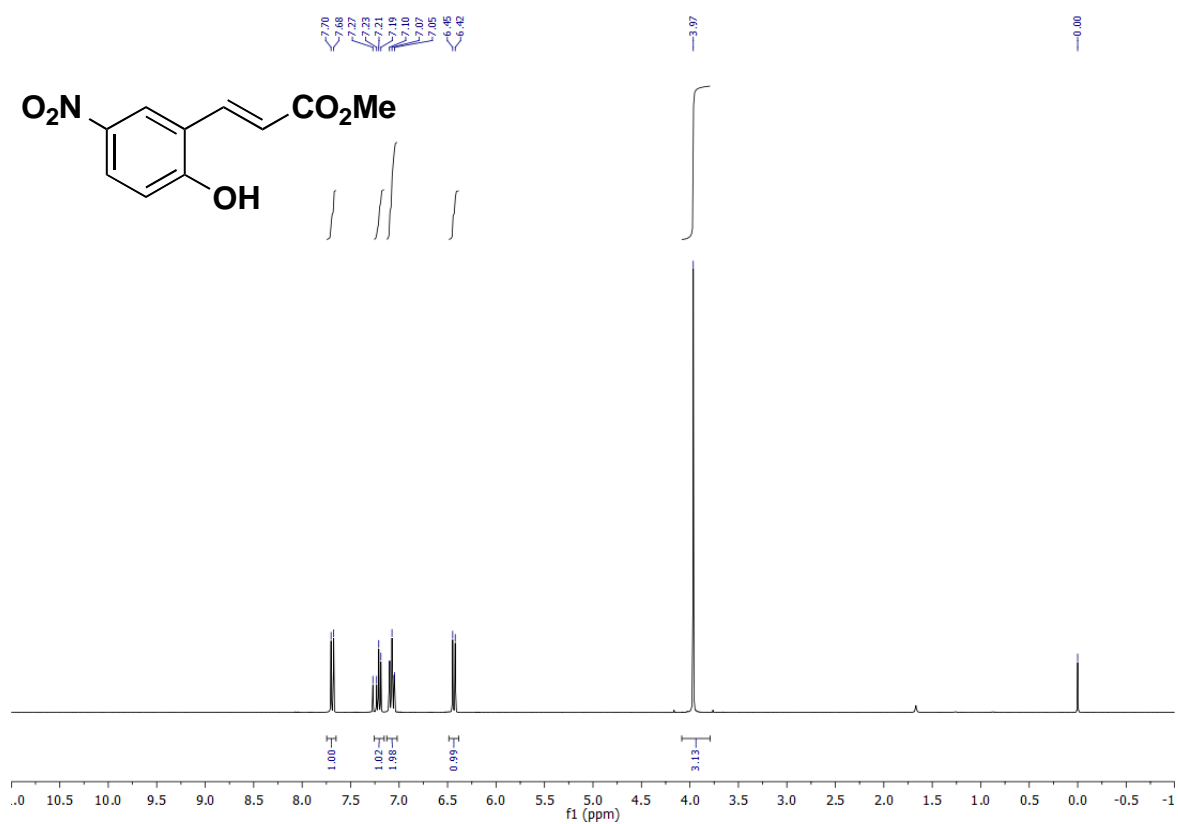

### $^{13}\text{C}$ NMR (90 MHz) of 5-nitro-2-hydroxy-(*E*)-cinnamic acid methyl ester (3b)

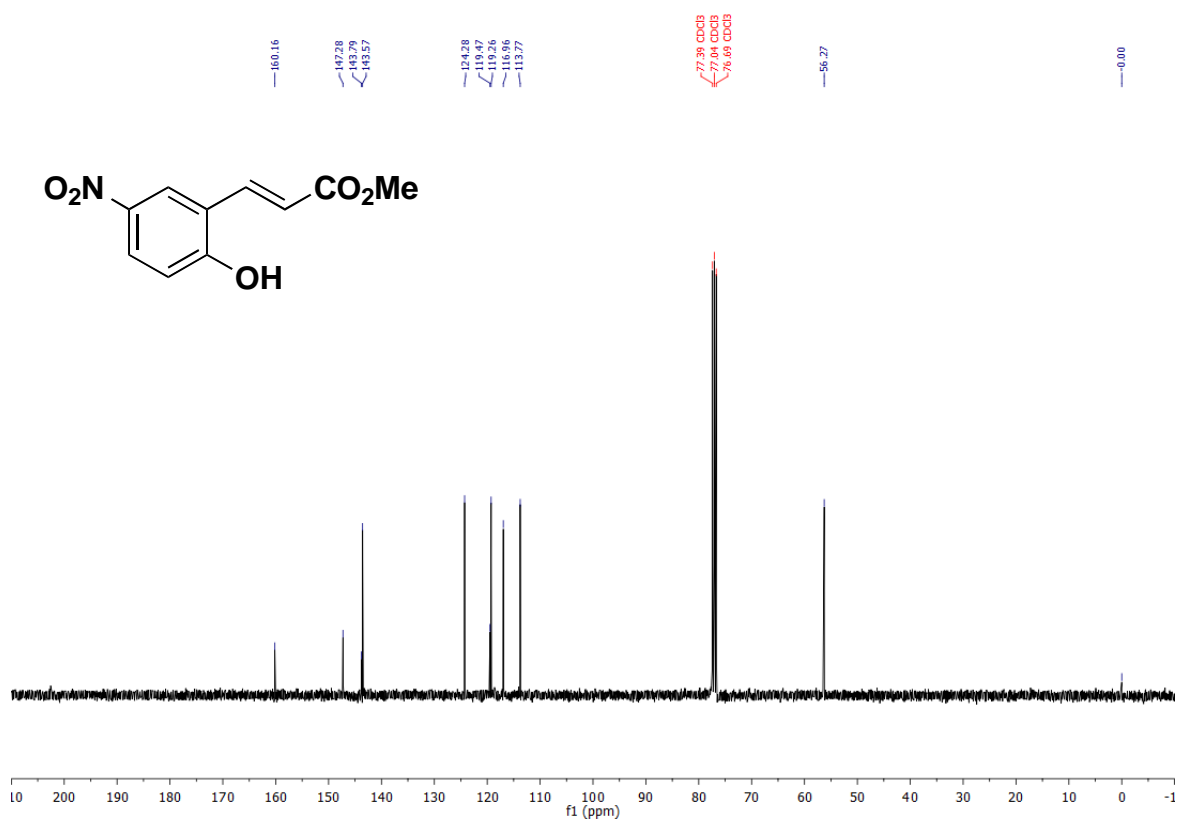



### <sup>1</sup>H NMR (360 MHz) of 2-hydroxy-3-methoxy-(*E*)-cinnamic acid methyl ester (3d)

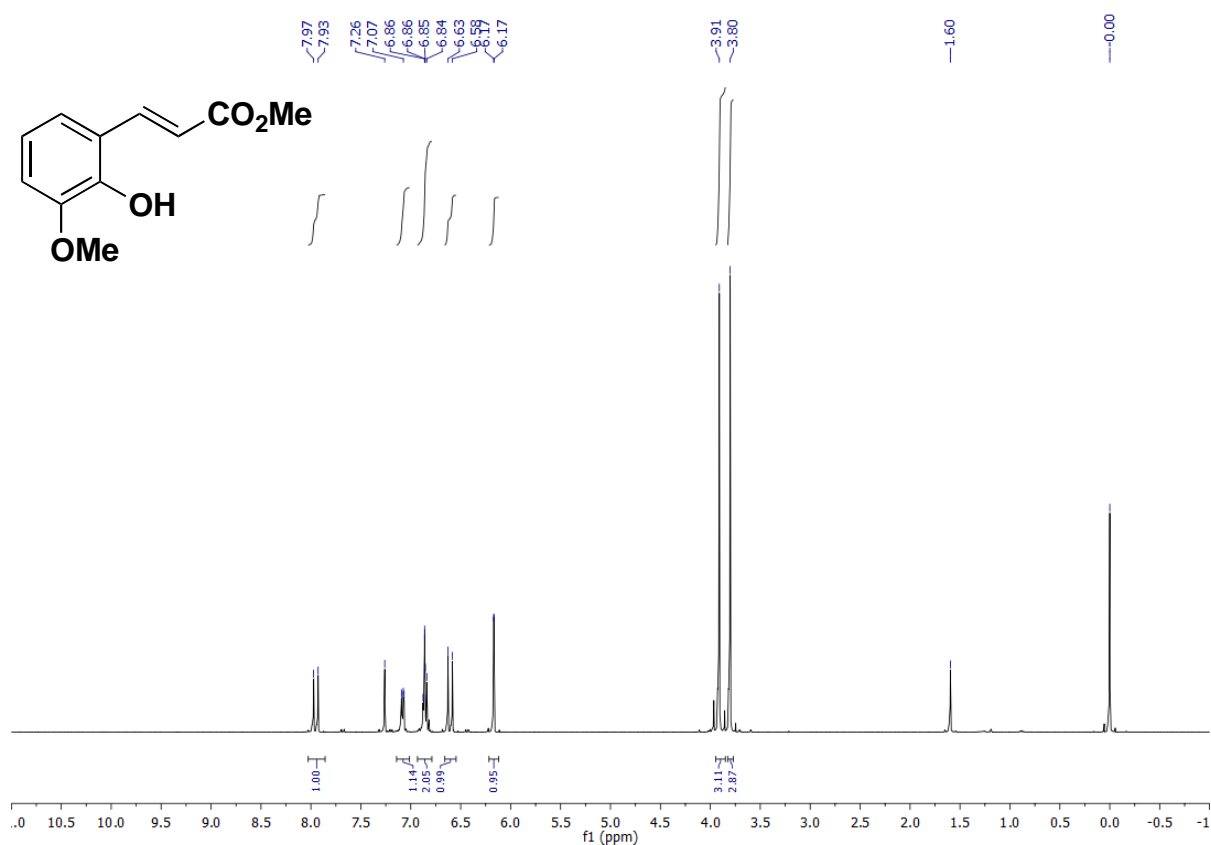

### <sup>13</sup>C NMR (90 MHz) of 2-hydroxy-3-methoxy-(*E*)-cinnamic acid methyl ester (3d)

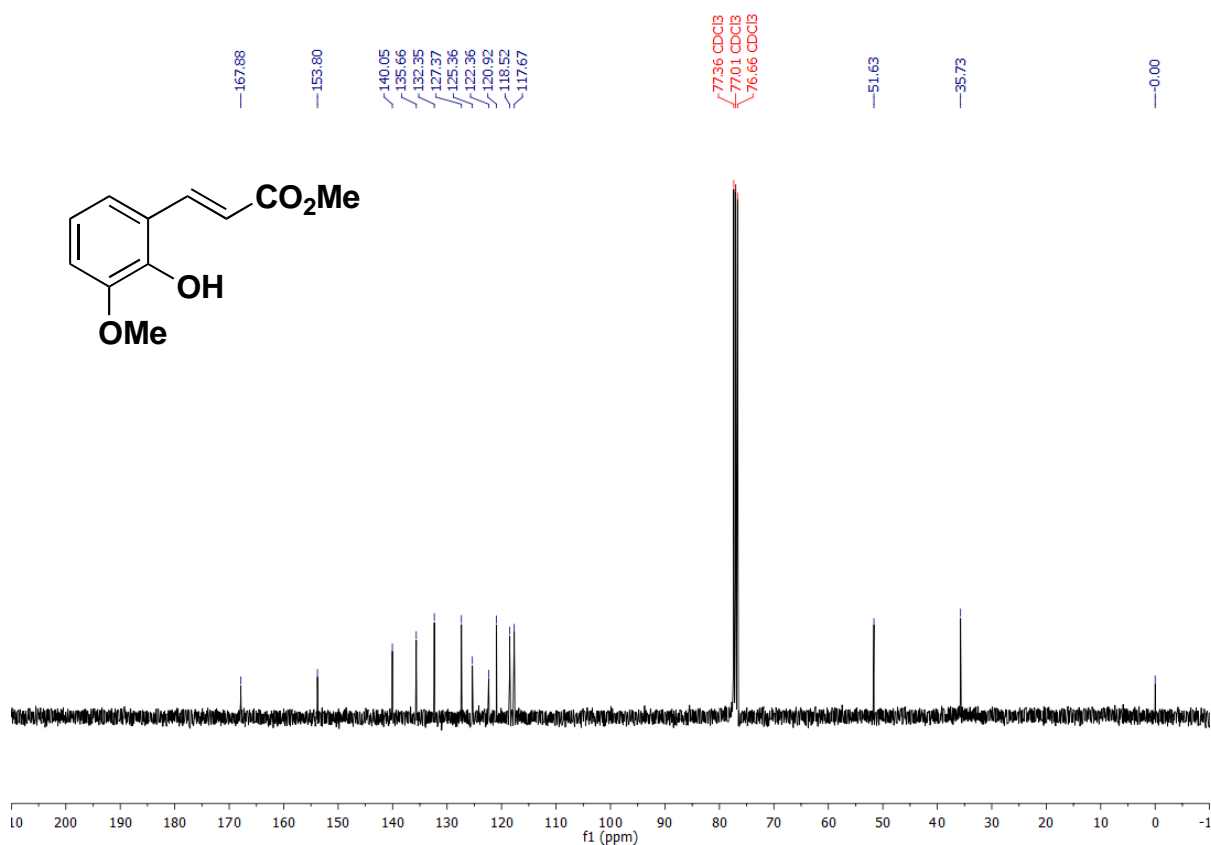

### <sup>1</sup>H NMR (360 MHz) of 3-allyl-2-hydroxy-(*E*)-cinnamic acid methyl ester (3g)

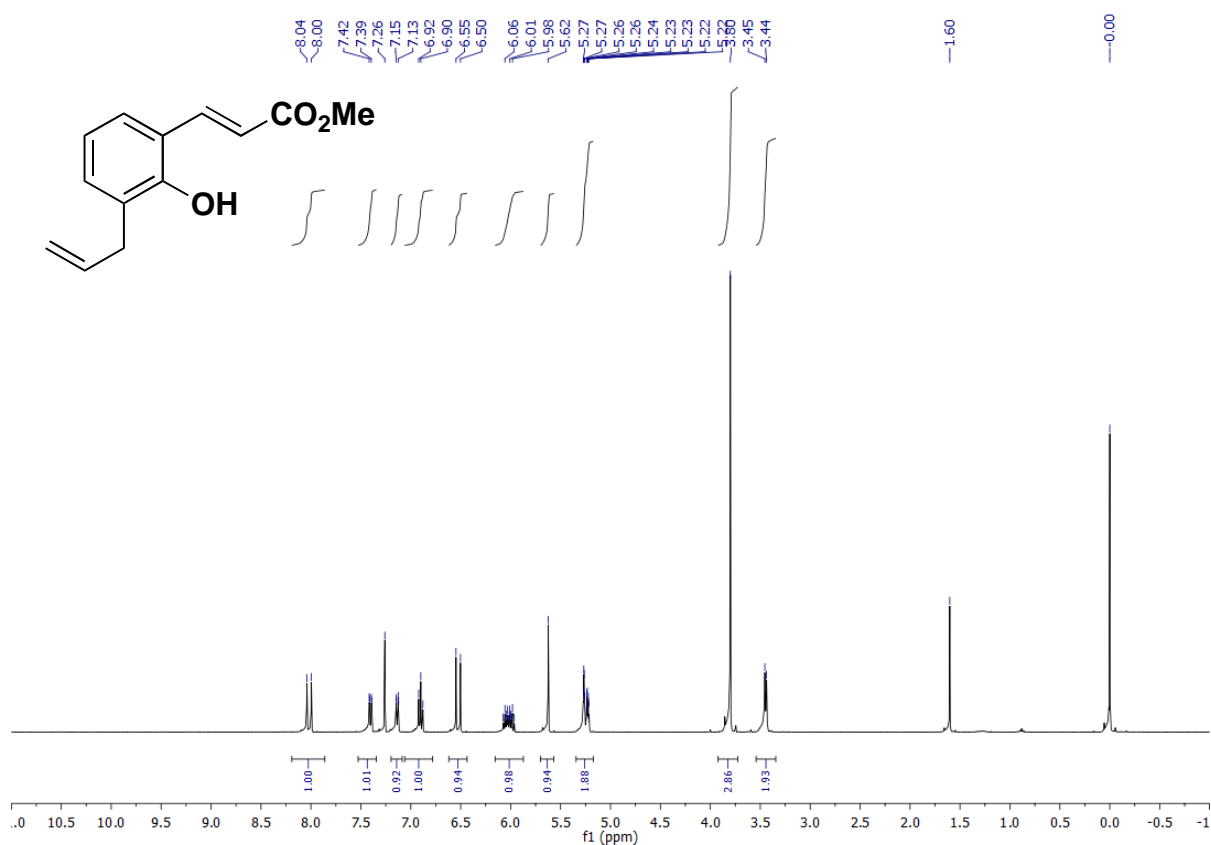

### <sup>13</sup>C NMR (90 MHz) of 3-allyl-2-hydroxy-(*E*)-cinnamic acid methyl ester (3g)

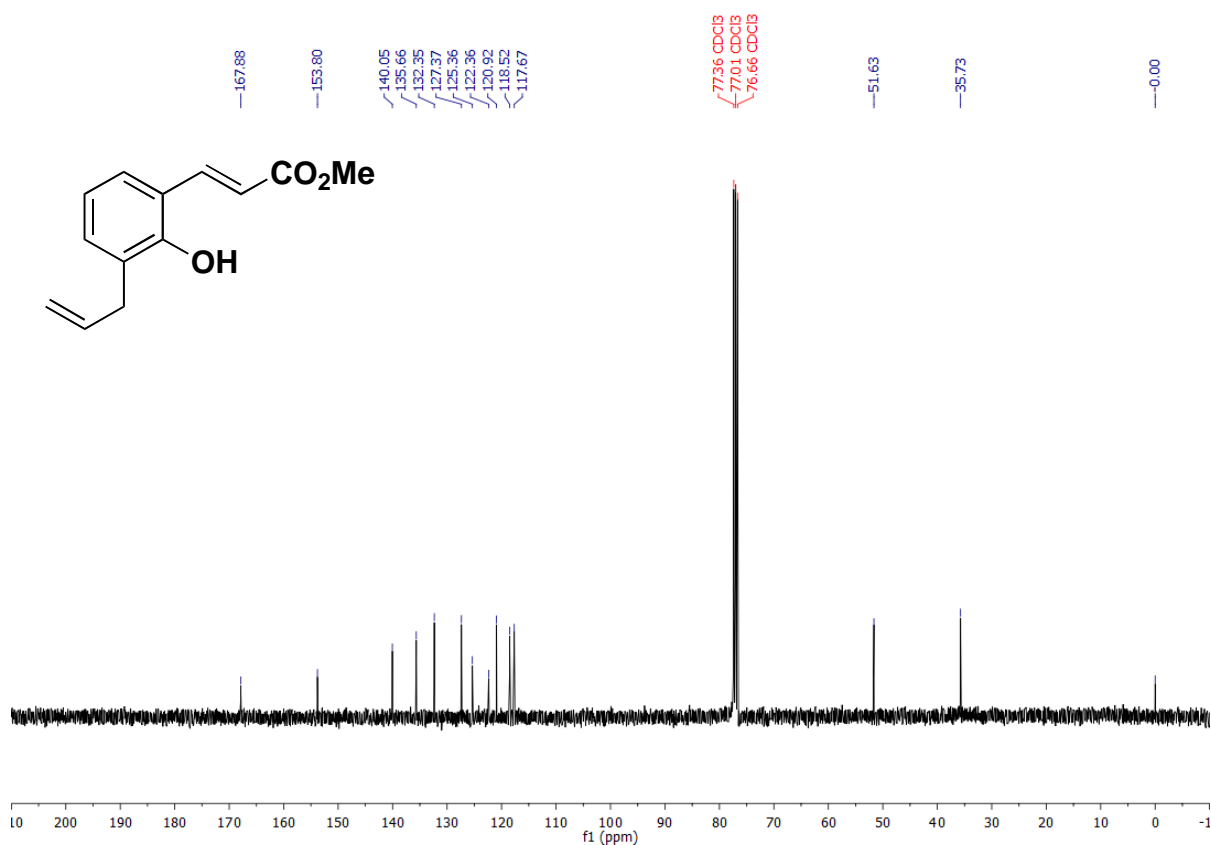

### <sup>1</sup>H NMR (360 MHz, CDCl<sub>3</sub>) of coumarin (2 = 4a)

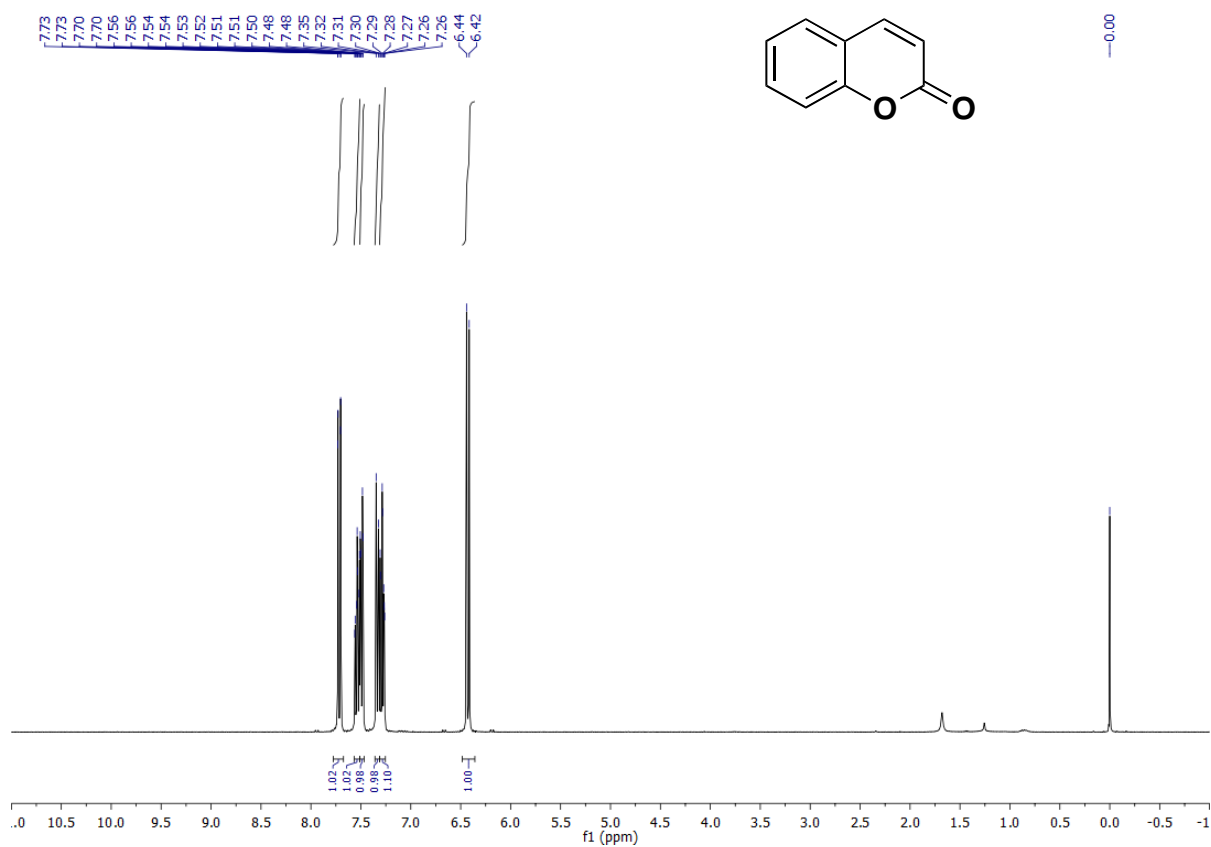

### <sup>13</sup>C NMR (90 MHz, CDCl<sub>3</sub>) of coumarin (2 = 4a)

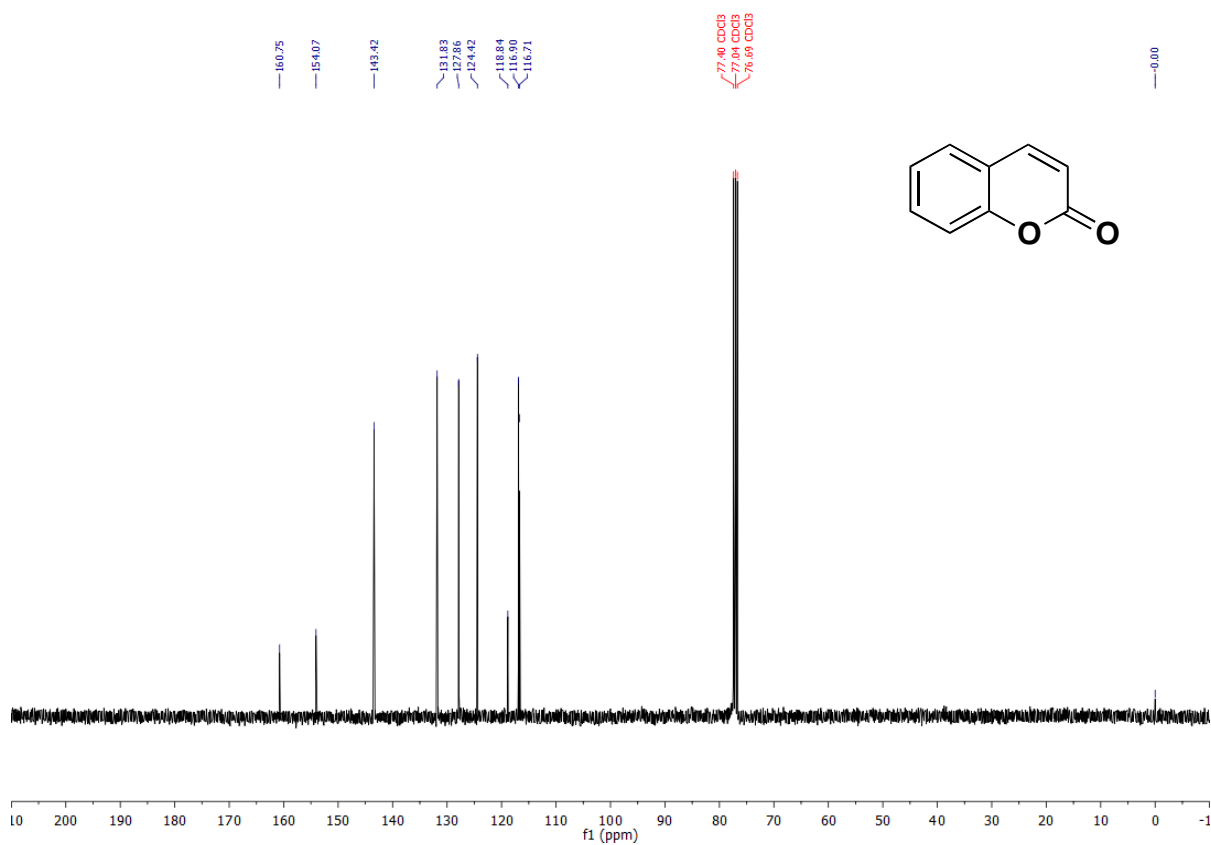

### $^1\text{H}$ NMR (360 MHz, $\text{CDCl}_3$ ) of 3*H*-benzo[*f*]chromen-3-one (4c)

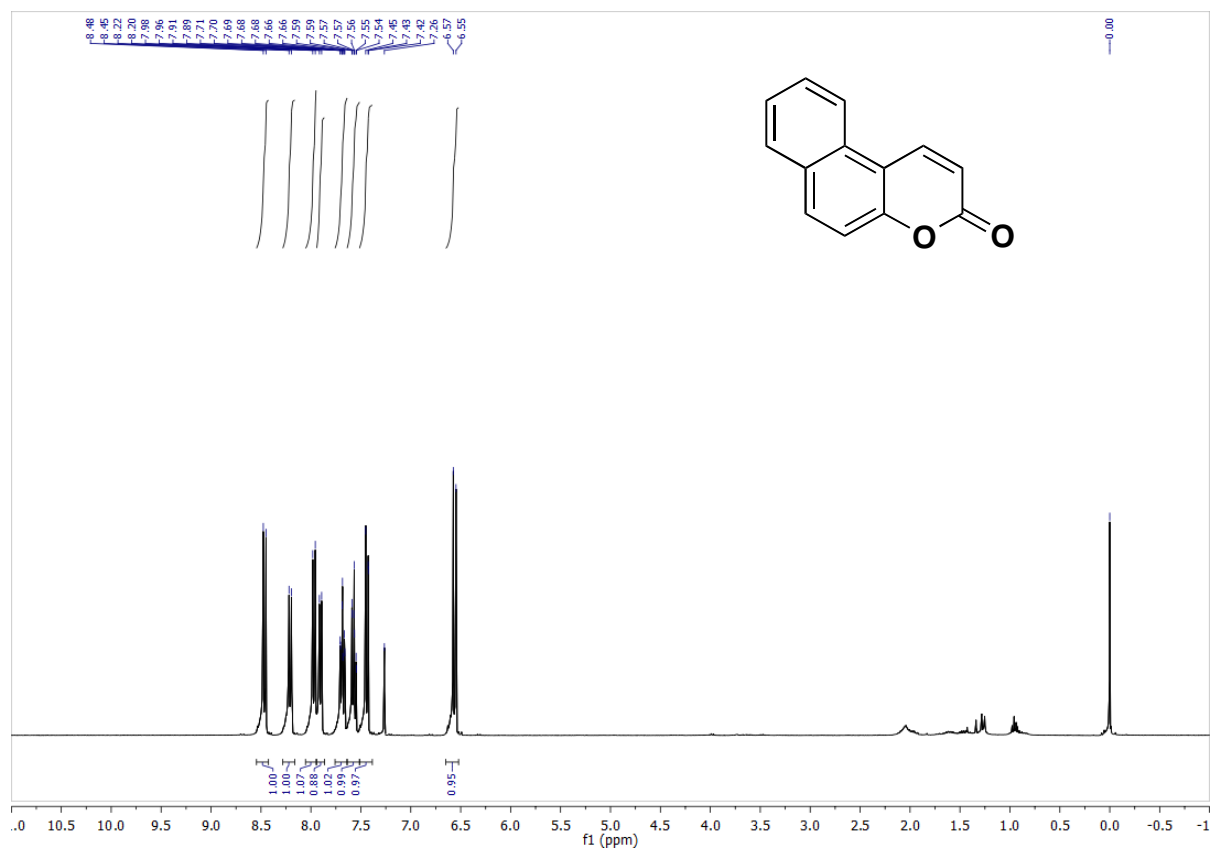

### $^{13}\text{C}$ NMR (90 MHz, $\text{CDCl}_3$ ) of 3*H*-benzo[*f*]chromen-3-one (4c)

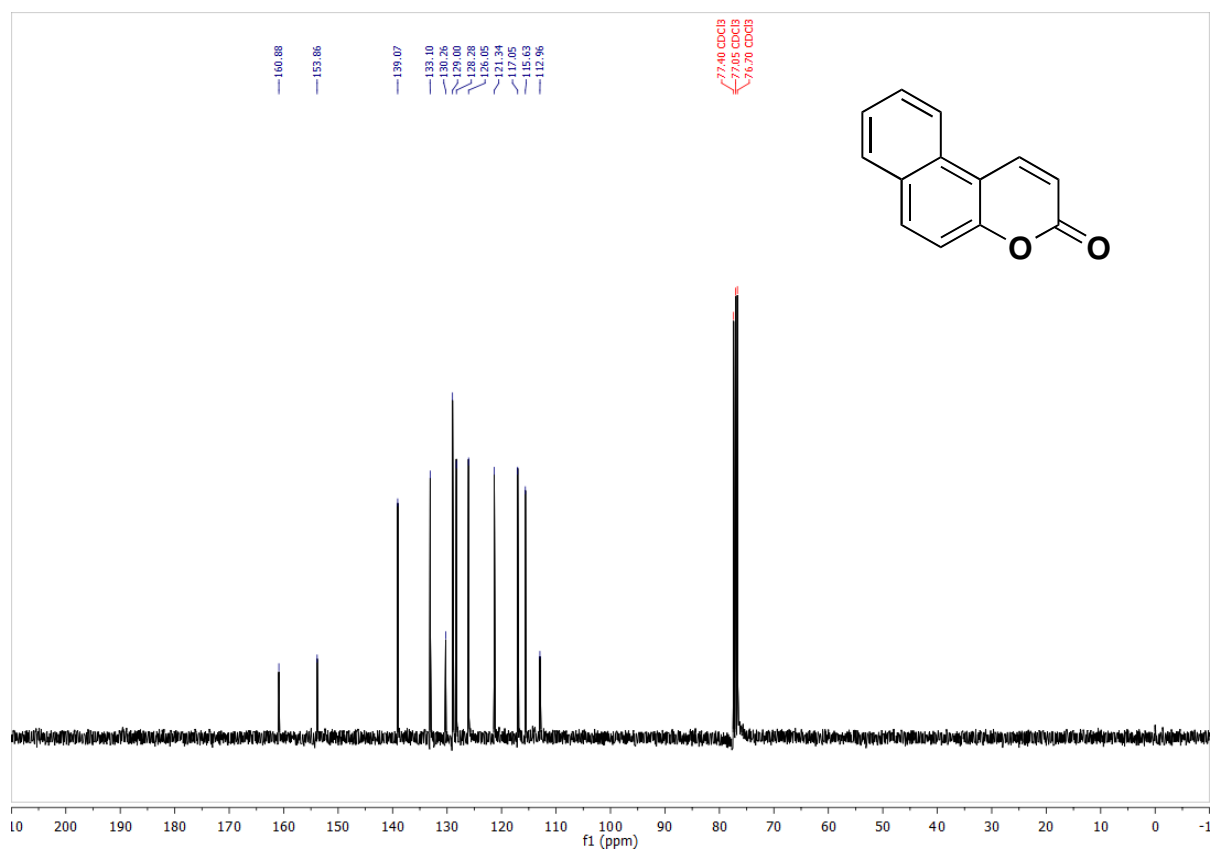

# <sup>1</sup>H NMR (360 MHz, CDCl<sub>3</sub>) of 8-methoxycoumarin (4d)

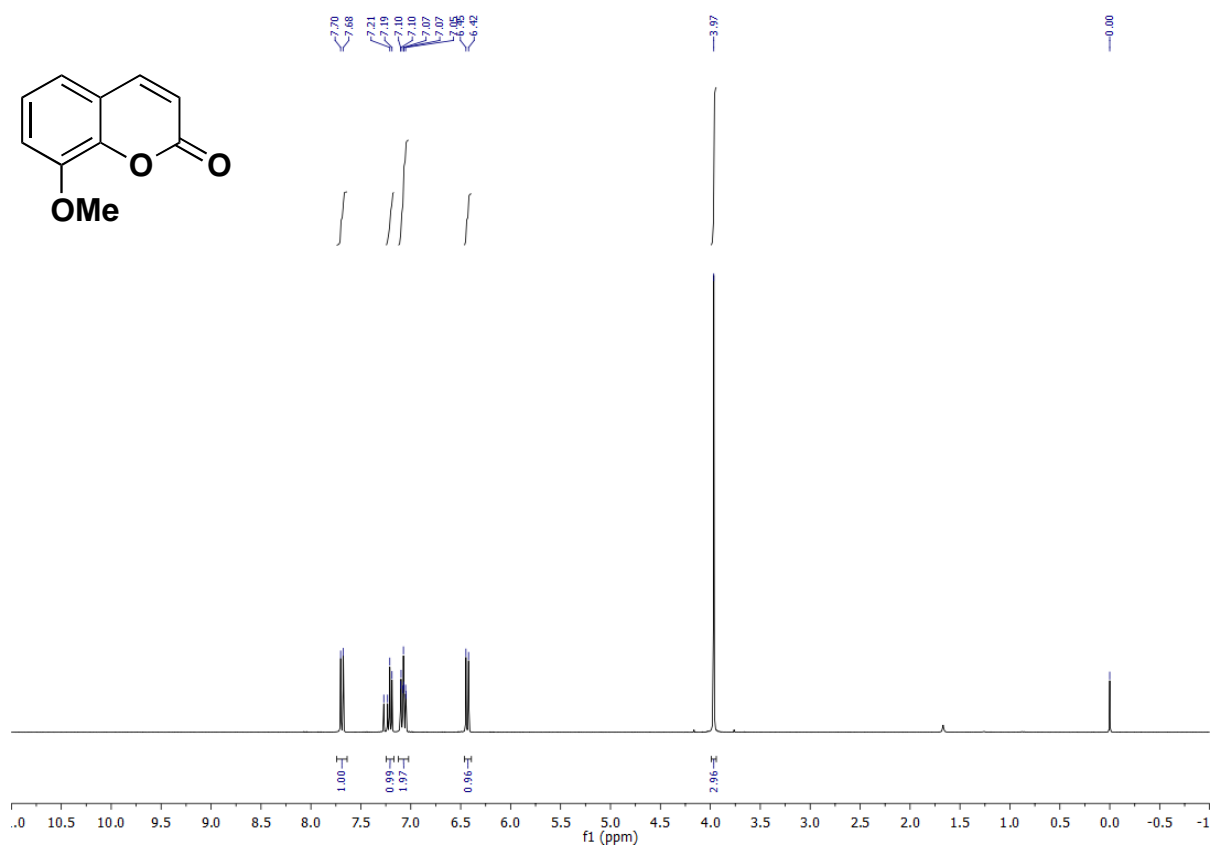

# <sup>13</sup>C NMR (90 MHz, CDCl<sub>3</sub>) of 8-methoxycoumarin (4d)

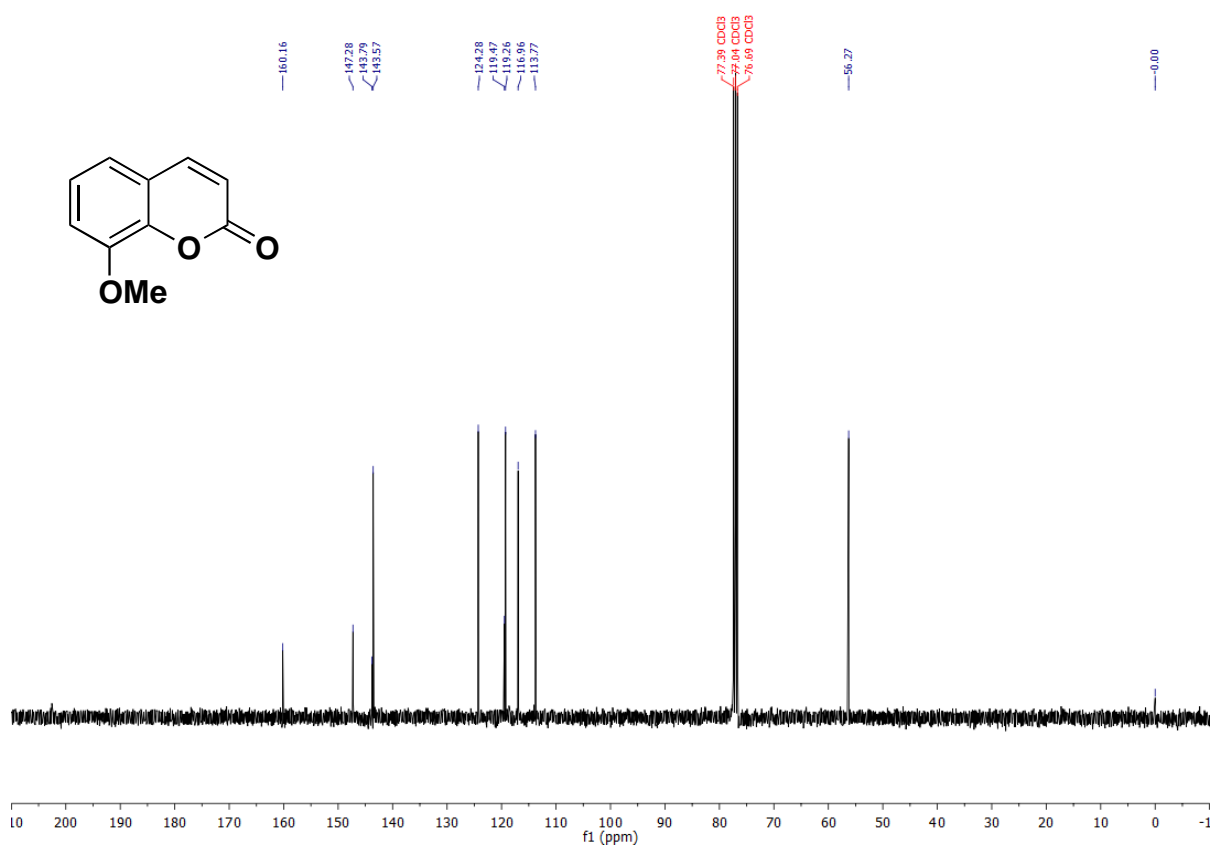

**<sup>1</sup>H NMR (360 MHz, CDCl<sub>3</sub>) of 7-methoxycoumarin (4e)**

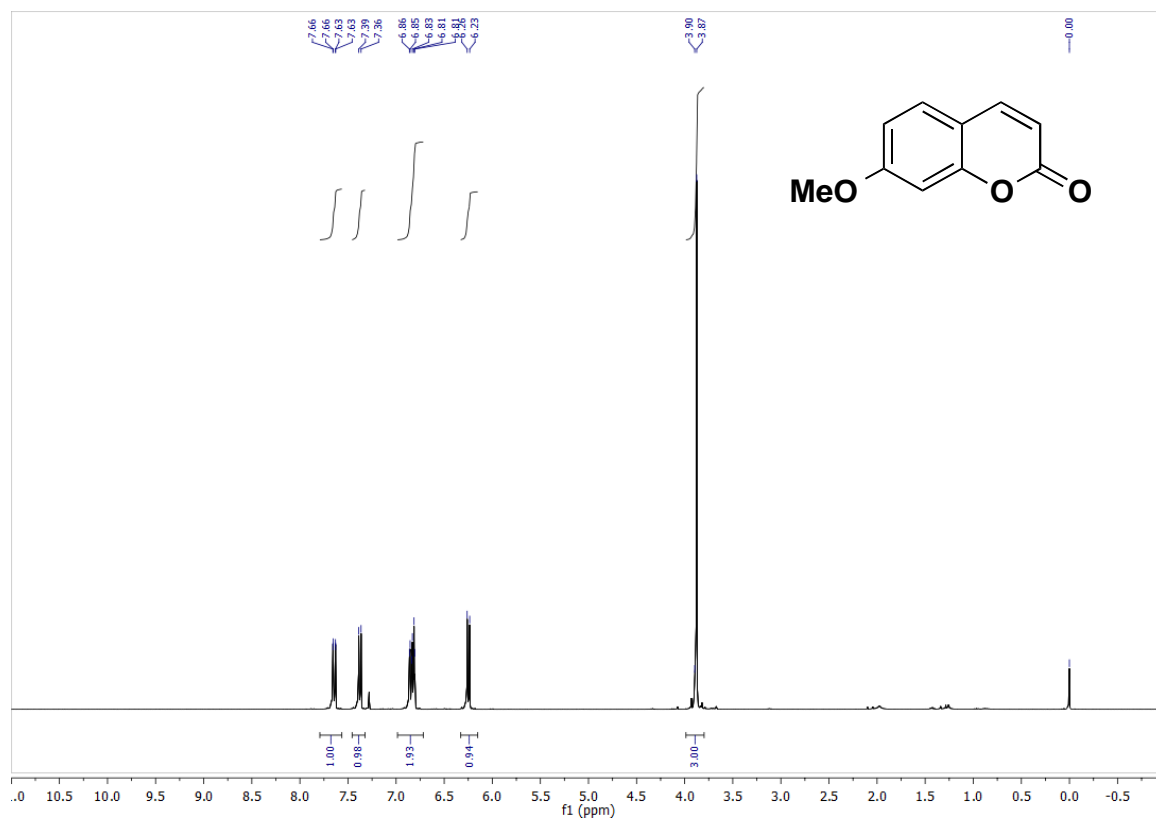

**<sup>13</sup>C NMR (90 MHz, CDCl<sub>3</sub>) of 7-methoxycoumarin (4e)**

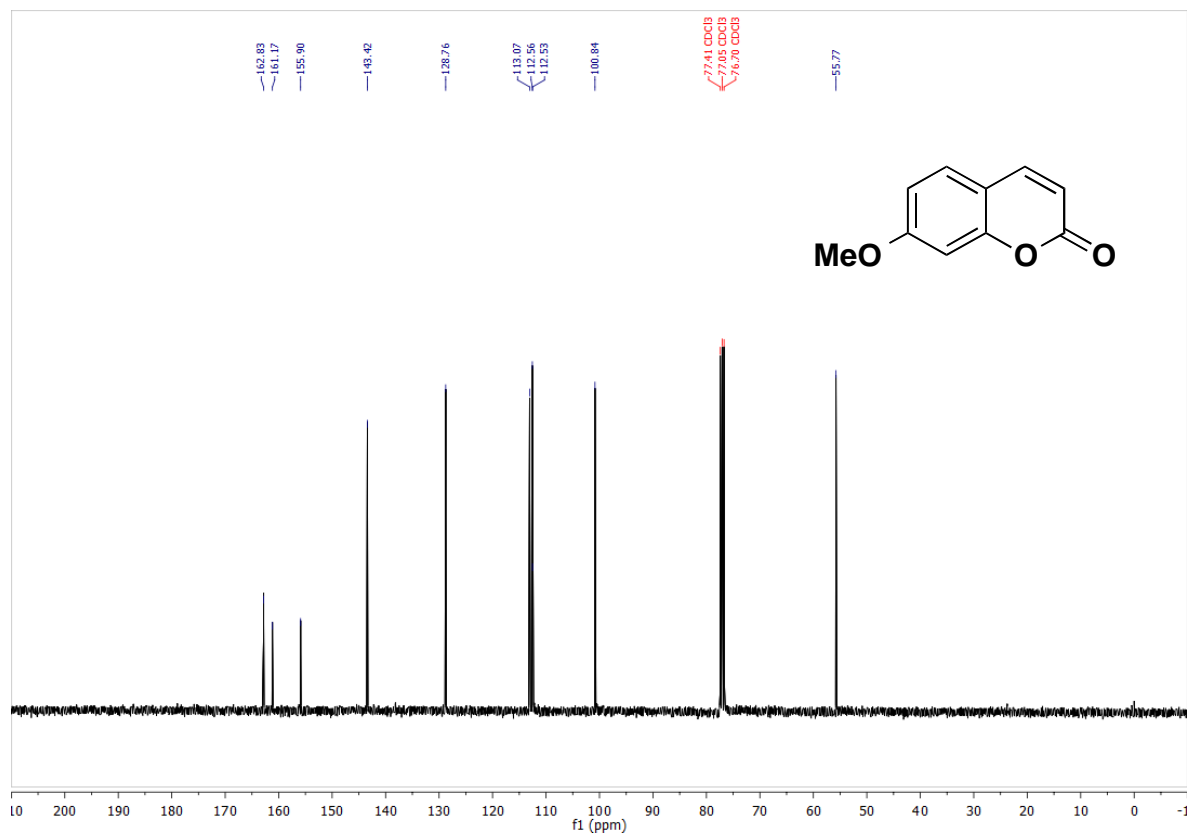

**<sup>1</sup>H NMR (360 MHz, CDCl<sub>3</sub>) of 7-(diethylamino)coumarin (4f)**

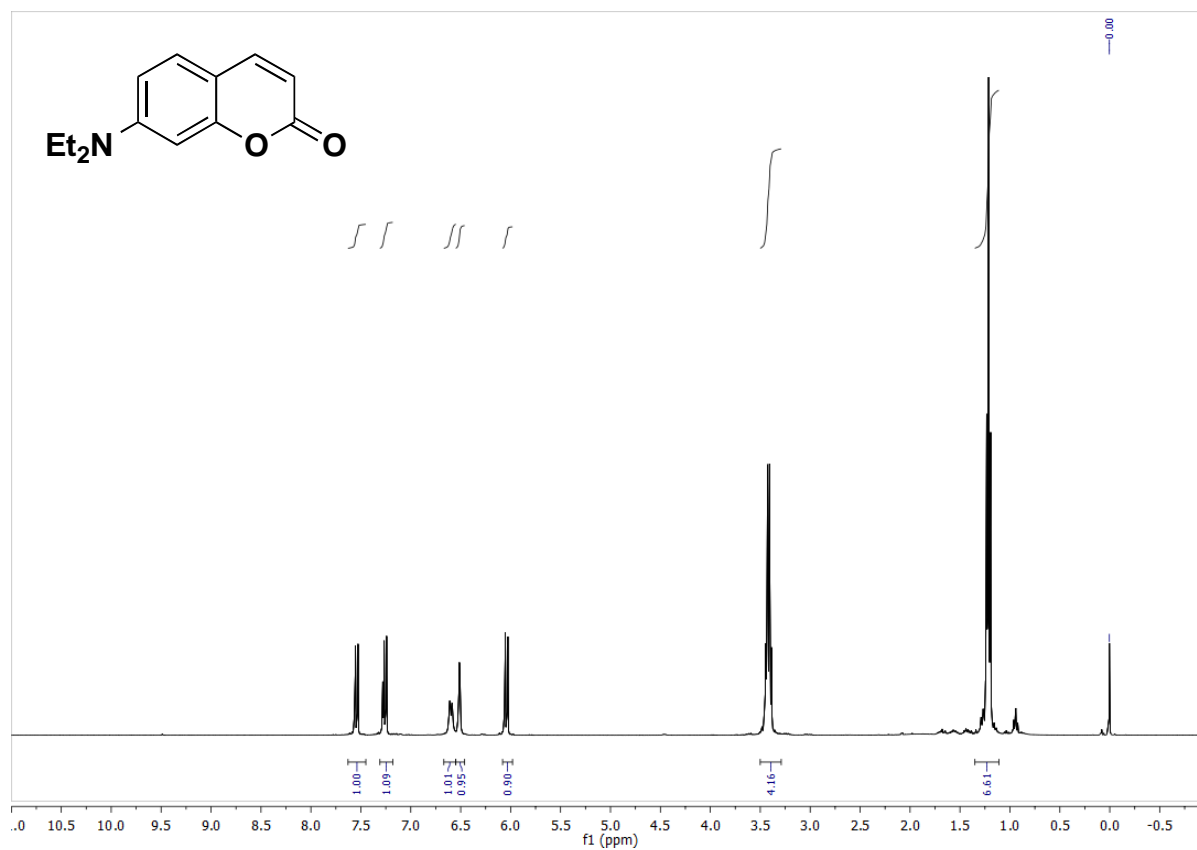

**<sup>13</sup>C NMR (90 MHz, CDCl<sub>3</sub>) of 7-(diethylamino)coumarin (4f)**

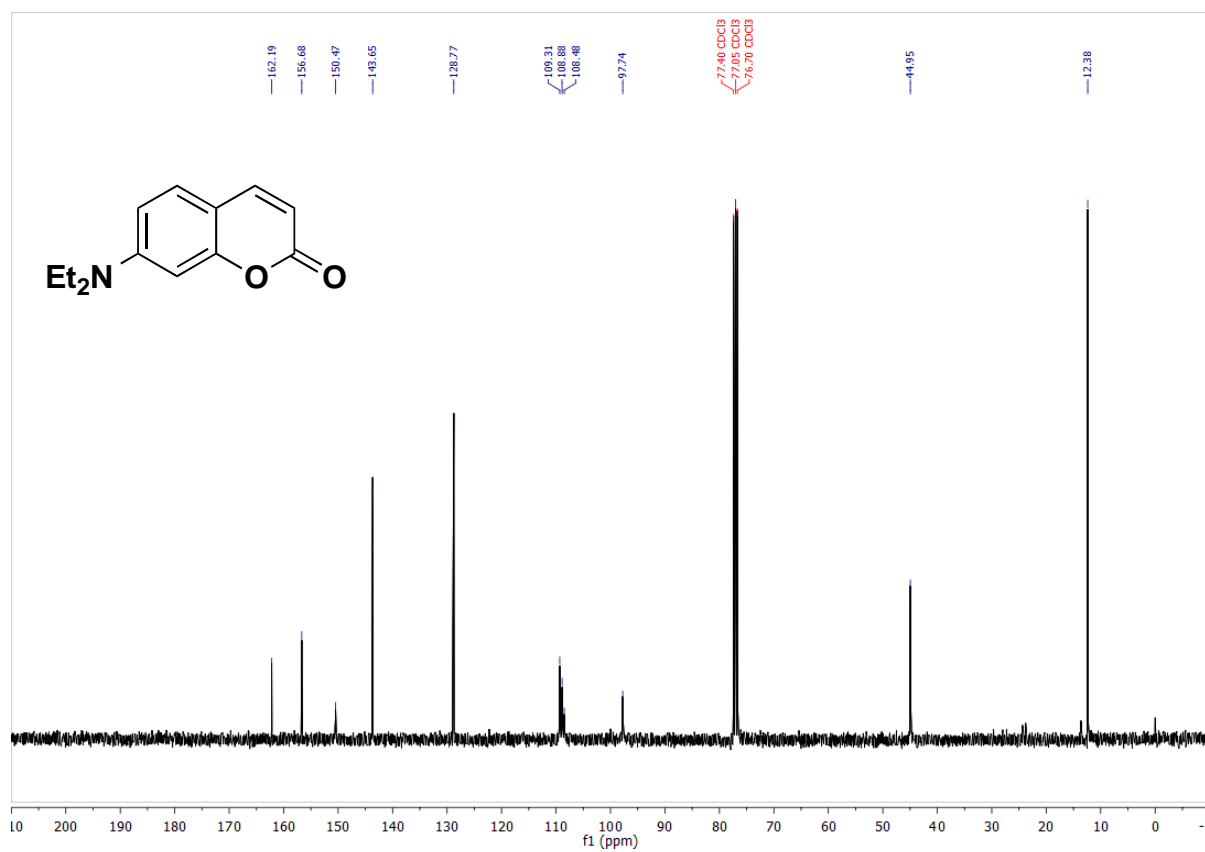

# <sup>1</sup>H NMR (360 MHz, CDCl<sub>3</sub>) of 8-allyl-2H-chromen-2-one (4g)

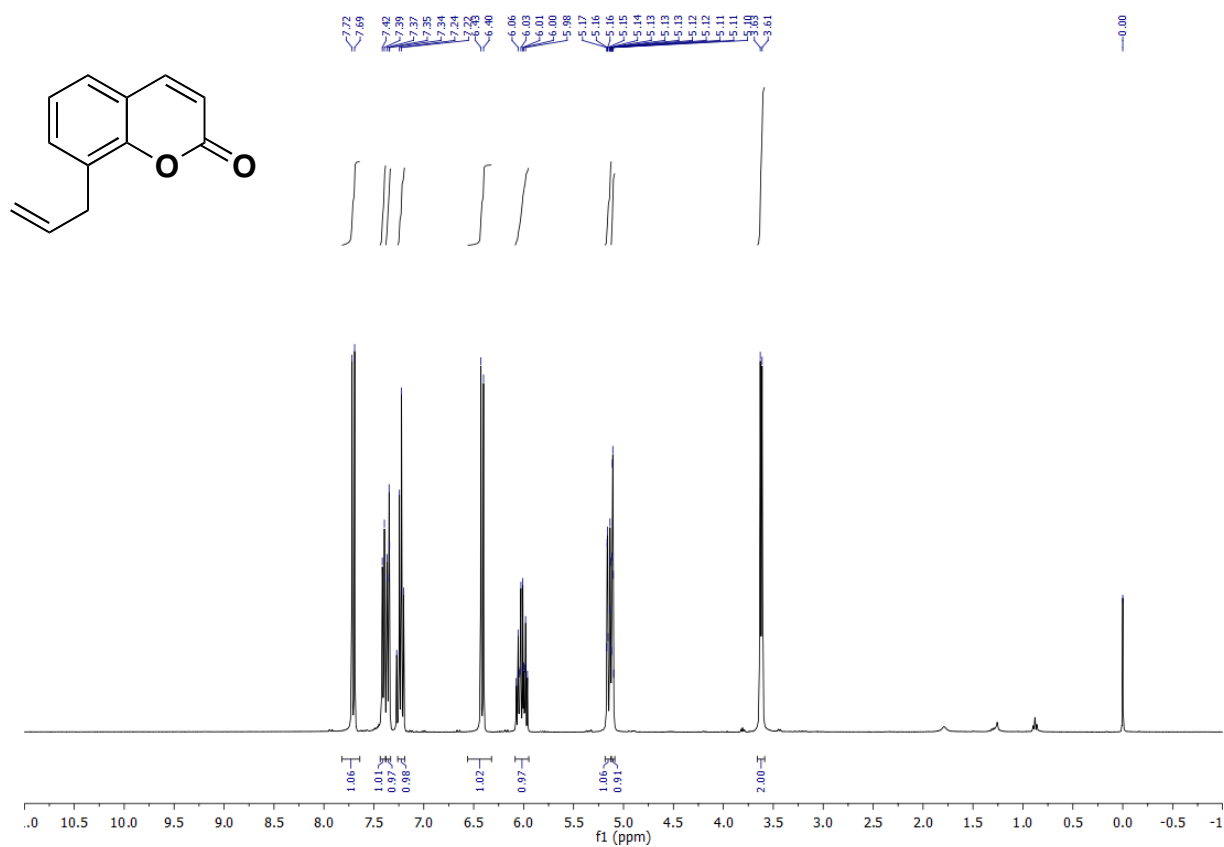

# <sup>13</sup>C NMR (90 MHz, CDCl<sub>3</sub>) of 8-allyl-2H-chromen-2-one (4g)

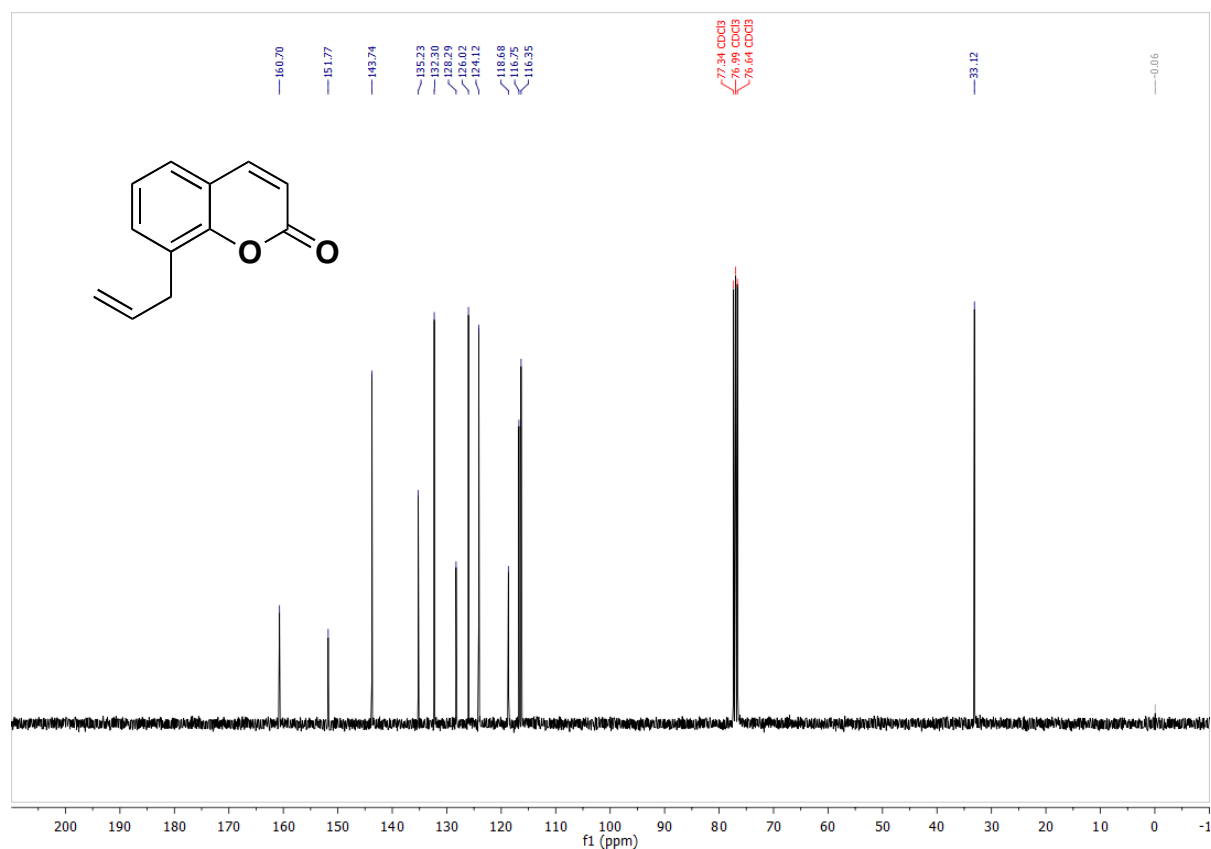



**<sup>1</sup>H NMR (360 MHz, CDCl<sub>3</sub>) of 6-bromo-2H-chromen-2-one (4h)**

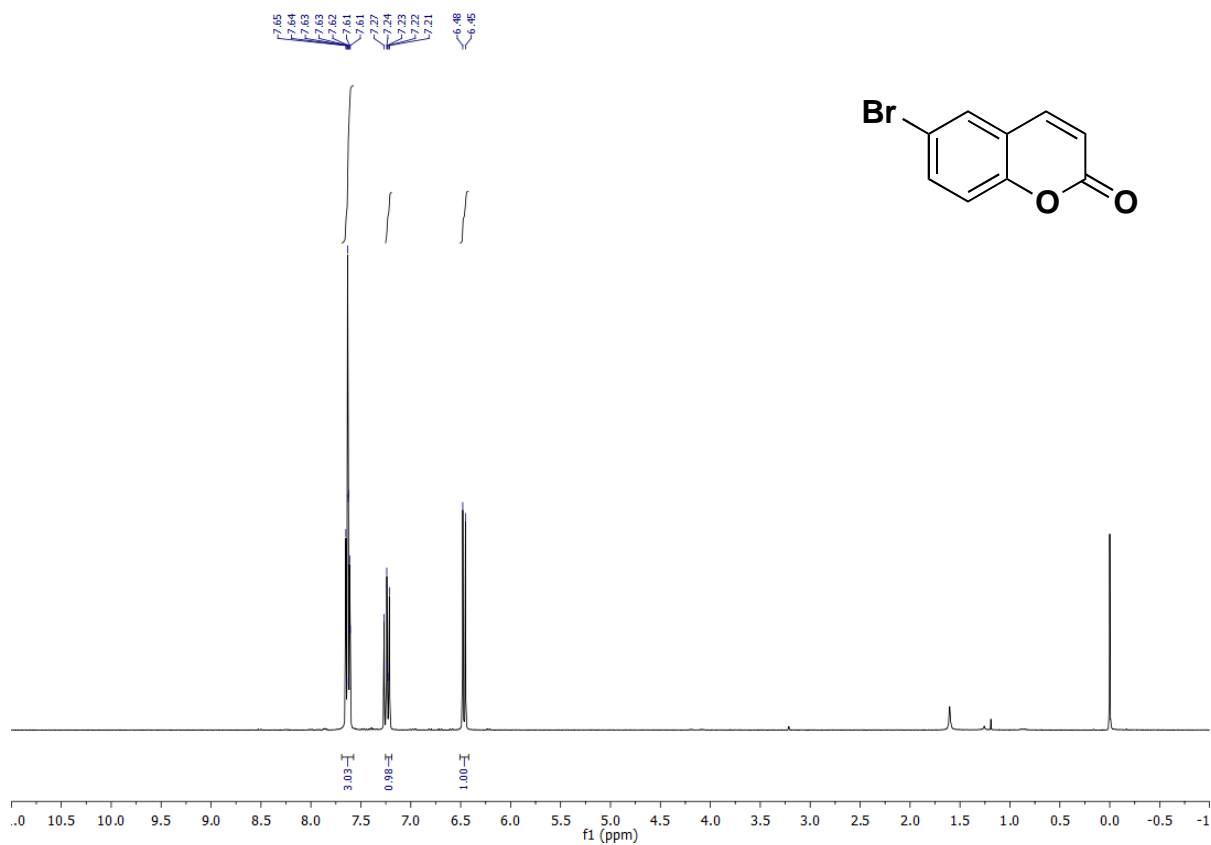

**<sup>13</sup>C NMR (90 MHz, CDCl<sub>3</sub>) of 6-bromo-2H-chromen-2-one (4h)**

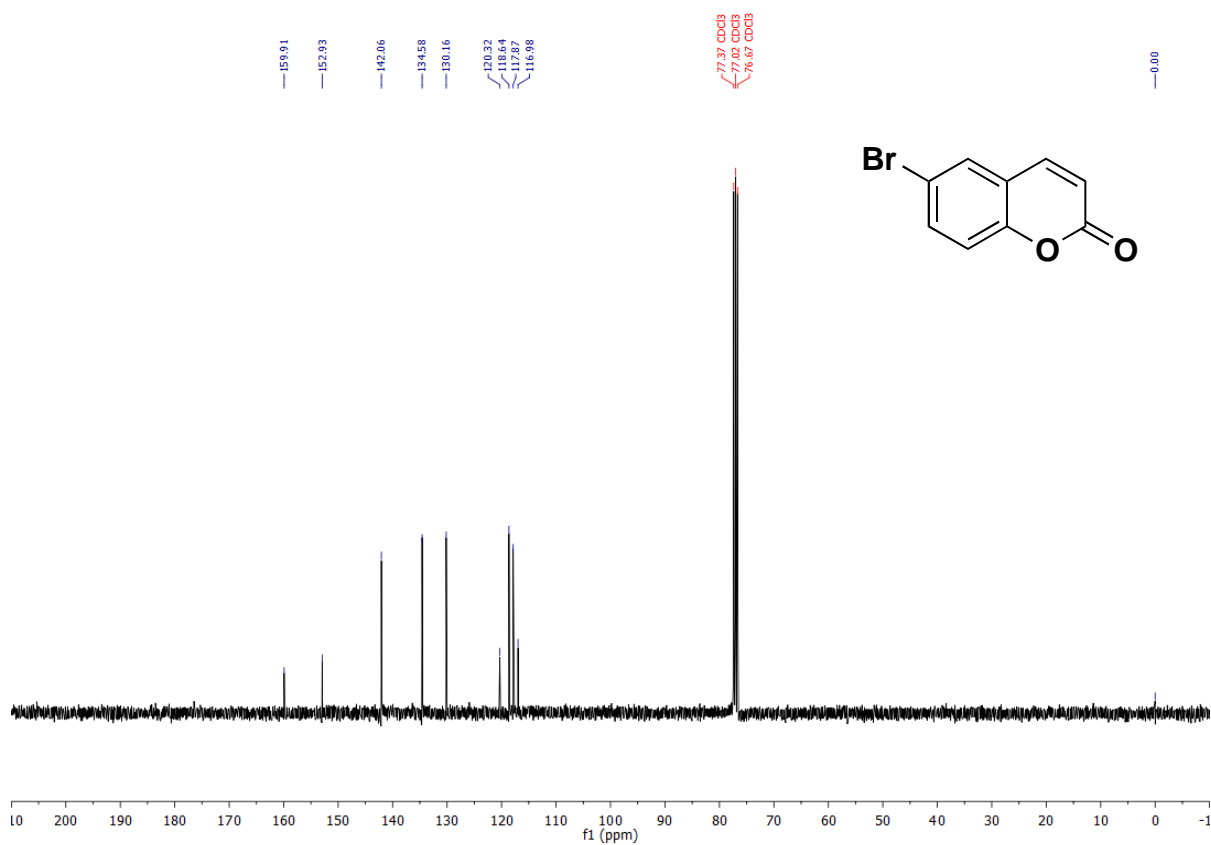

**<sup>1</sup>H NMR (360 MHz, CDCl<sub>3</sub>) of 6,8-di-*tert*-butyl-2*H*-chromen-2-one (4i)**

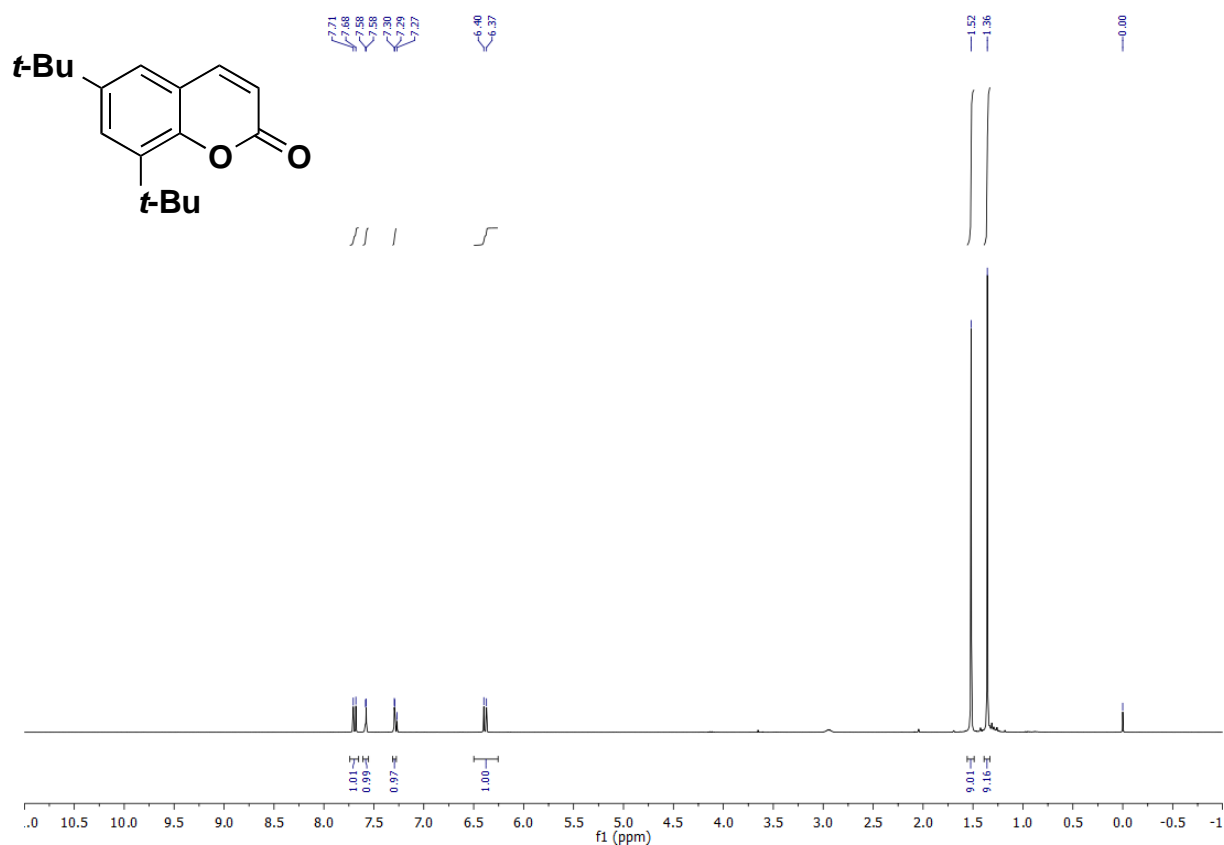

**<sup>13</sup>C NMR (90 MHz, CDCl<sub>3</sub>) of 6,8-di-*tert*-butyl-2*H*-chromen-2-one (4i)**

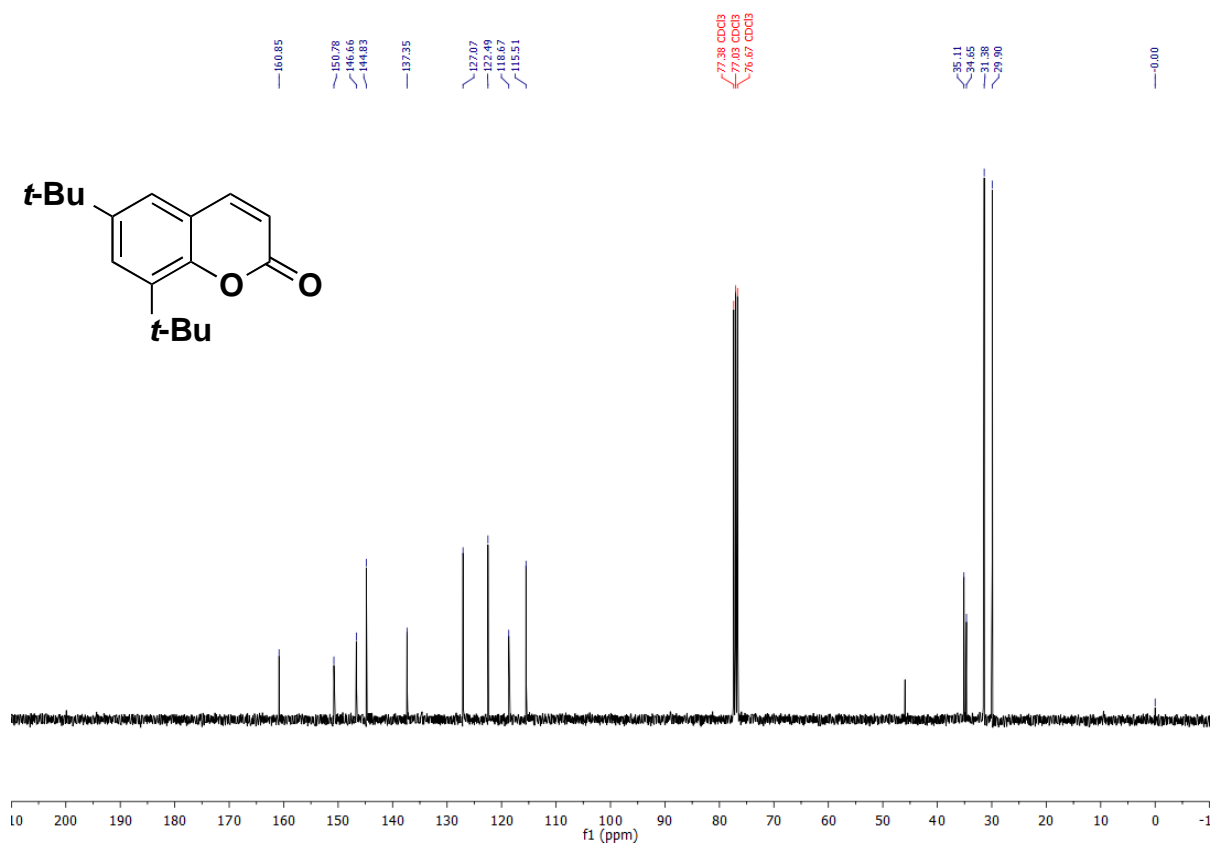

Supplement: Beilstein_J_Org_Chem-08-1630-s001.pdf [file Beilstein_J_Org_Chem-08-1630-s001.pdf]
